# Supplementary material for: Monomeric and polymeric derivatives of 5-aminoisophthalic acid as selective inhibitors of the β-polymorph of l-glutamic acid
Source: Royal Society of Chemistry journal article supplement (doi:10.1039/b612412g), 2006-11-24
Supplement: b612412g.pdf [file b612412g.pdf]

Electronic Supplementary Information

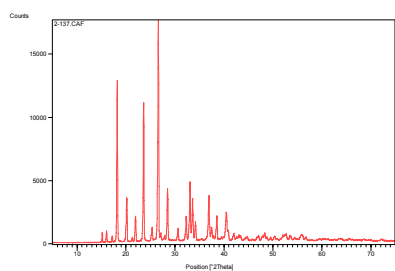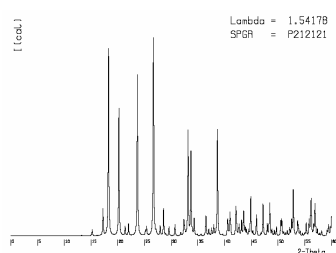

Recorded (above) and simulated (below) PXRD patterns of  $\alpha$ -L-glutamic acid.

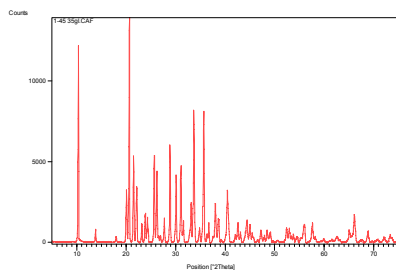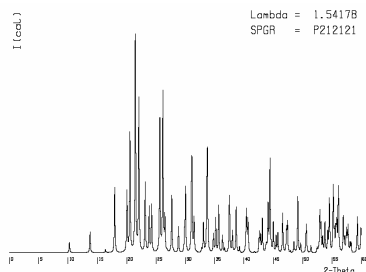

Recorded (above) and simulated (below) PXRD patterns of  $\beta$ -L-glutamic acid.
